# Supplementary material for: B–Hb⋯π interaction in borane–graphene complexes: coronene as a case study
Source: Royal Society of Chemistry journal article supplement (doi:10.1039/c7nj00057j), 2017-01-01
Supplement: c7nj00057j1.pdf [file c7nj00057j1.pdf]

## Electronic Supplementary Information

**JOURNAL: NEW JOURNAL OF CHEMISTRY**

**Manuscript ID NJ-ART-01-2017-000057**

**Title: B–H<sub>b</sub>⋯π interaction in borane-graphene complexes: Coronene as a case study**

Bapan Saha and Pradip Kr. Bhattacharyya\*

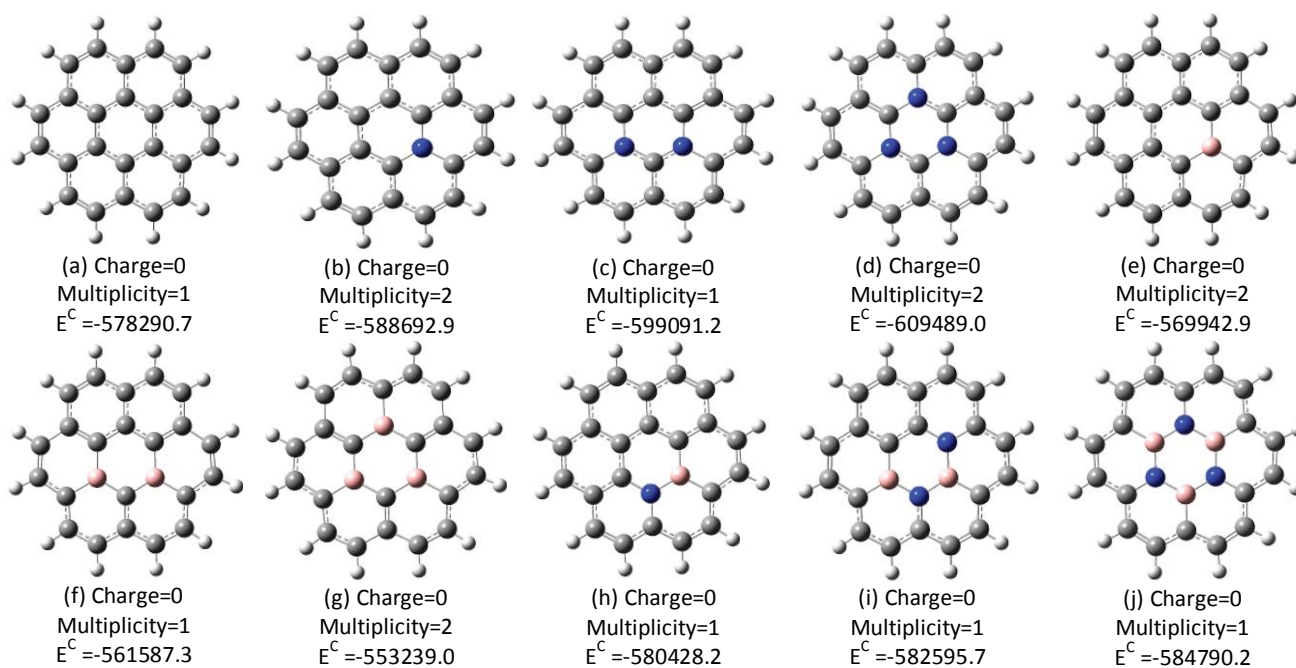

**Supplementary Fig. S1** Gas phase optimized structures with their respective charge, multiplicity and energy ( $\text{kcal mol}^{-1}$ ) for (a) Cor (b) Cor<sub>(N)</sub> (c) Cor<sub>(2N)</sub> (d) Cor<sub>(3N)</sub> (e) Cor<sub>(B)</sub> (f) Cor<sub>(2B)</sub> (g) Cor<sub>(3B)</sub> (h) Cor<sub>(BN)</sub> (i) Cor<sub>(2BN)</sub> (j) Cor<sub>(3BN)</sub> obtained at M06-2X/6-31++G(d,p) level of theory.

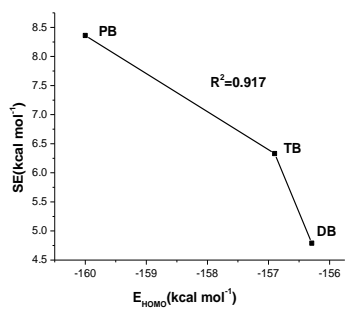

(a)

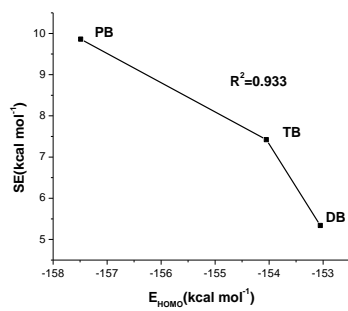

(b)

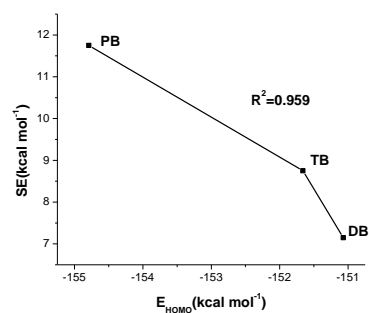

(c)

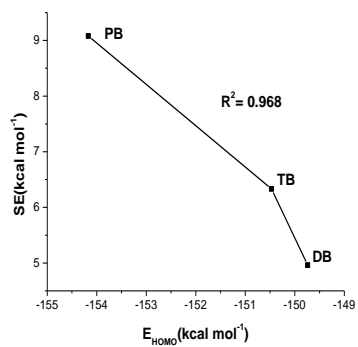

(d)

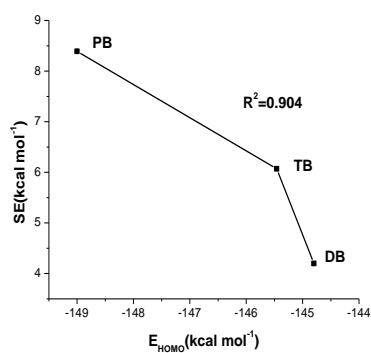

(e)

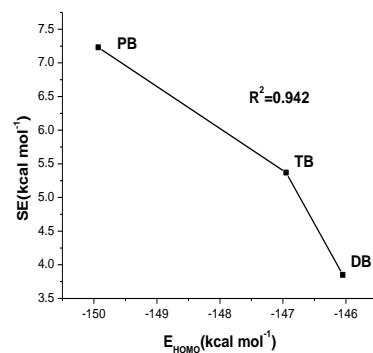

(f)

**Supplementary Fig. S2** Plot of  $E_{\text{HOMO}}$  vs SE with  $R^2$  values for the complexes formed by (a)  $\text{Cor}_{(\text{B})}$  (b)  $\text{Cor}_{(2\text{B})}$  (c)  $\text{Cor}_{(3\text{B})}$  (d)  $\text{Cor}_{(1\text{BN})}$  (e)  $\text{Cor}_{(2\text{BN})}$  (f)  $\text{Cor}_{(3\text{BN})}$  obtained at M06-2X/6-31++G(d,p) level of theory.

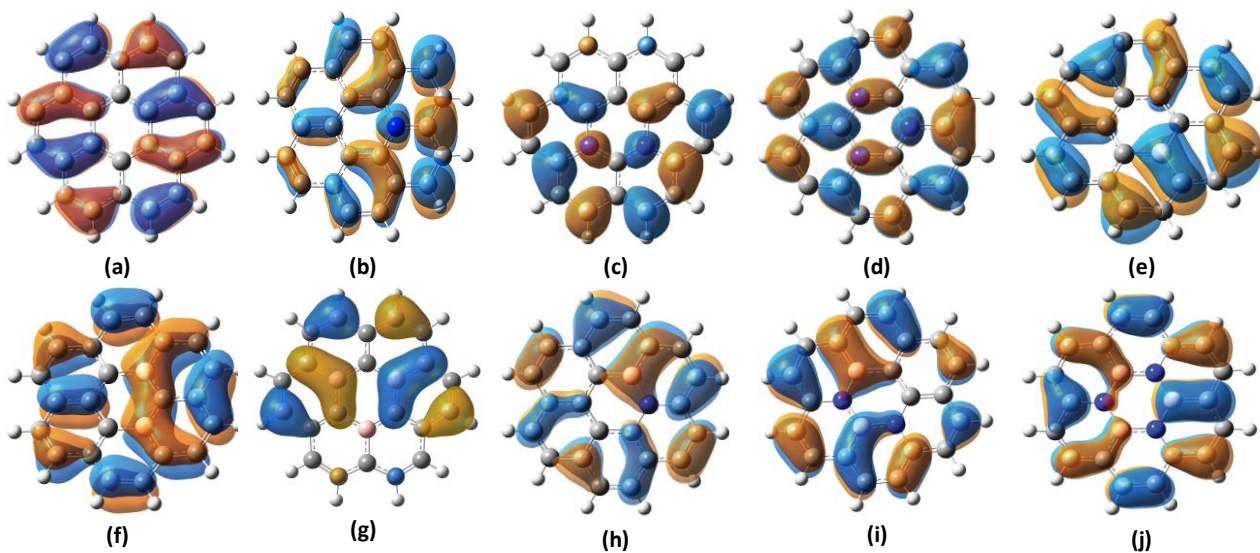

**Supplementary Fig. S3** Shapes of  $E_{\text{HOMO}}$  for (a) Cor (b)  $\text{Cor}_{(\text{N})}$  (c)  $\text{Cor}_{(2\text{N})}$  (d)  $\text{Cor}_{(3\text{N})}$  (e)  $\text{Cor}_{(\text{B})}$  (f)  $\text{Cor}_{(2\text{B})}$  (g)  $\text{Cor}_{(3\text{B})}$  (h)  $\text{Cor}_{(\text{BN})}$  (i)  $\text{Cor}_{(2\text{BN})}$  (j)  $\text{Cor}_{(3\text{BN})}$  obtained at M06-2X/6-31++G(d,p) level of theory.

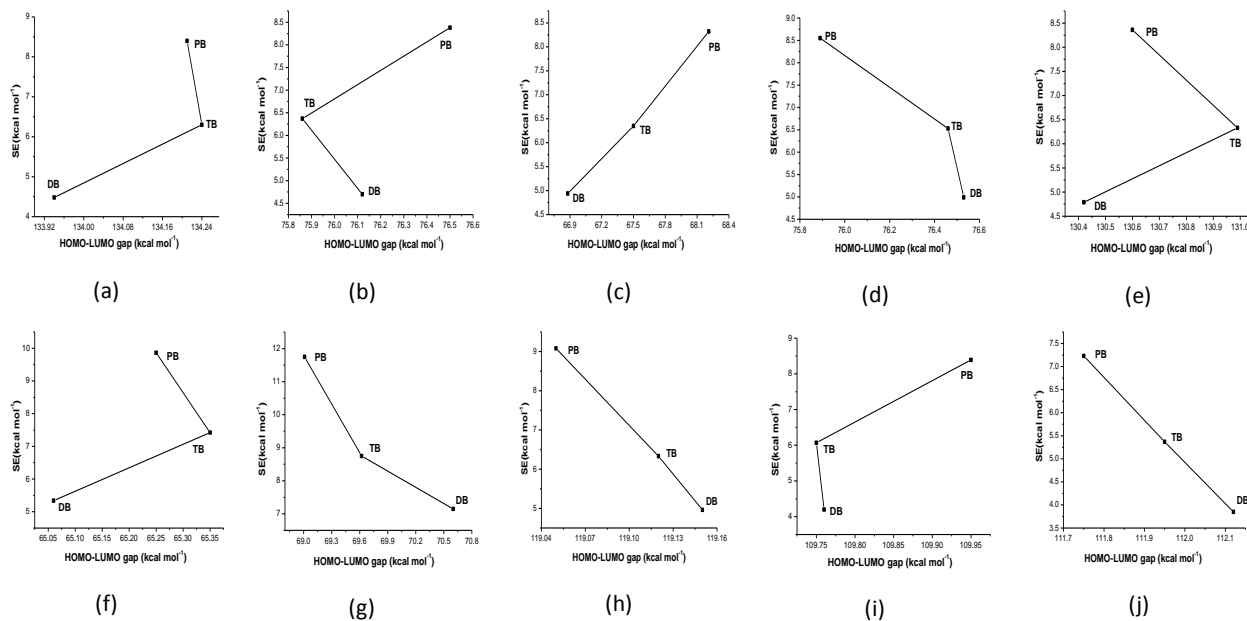

**Supplementary Fig. S4** Plot of  $\Delta E$  vs SE for the complexes formed by (a) Cor (b) Cor<sub>(N)</sub> (c) Cor<sub>(2N)</sub> (d) Cor<sub>(3N)</sub> (e) Cor<sub>(B)</sub> (f) Cor<sub>(2B)</sub> (g) Cor<sub>(3B)</sub> (h) Cor<sub>(BN)</sub> (i) Cor<sub>(2BN)</sub> (j) Cor<sub>(3BN)</sub> obtained at M06-2X/6-31++G(d,p) level of theory.

**Supplementary Table S1** NPA charge (NBO analysis) for free boranes and their complexes obtained at M06-2X/6-31++G(d,p) level of theory.

| System/<br>Complex         | Charge,<br>q at H <sub>b</sub> | Charge<br>Transfer, Δq | System/<br>Complex         | Charge,<br>q at H <sub>b</sub> | Charge<br>Transfer, Δq | System/<br>Complex         | Charge,<br>q at H <sub>b</sub> | Charge<br>Transfer, Δq |
|----------------------------|--------------------------------|------------------------|----------------------------|--------------------------------|------------------------|----------------------------|--------------------------------|------------------------|
| DB                         | 0.114                          | -                      | TB                         | 0.200                          | -                      | PB                         | 0.173                          | -                      |
| Cor...DB                   | 0.104                          | 0.010                  | Cor...TB                   | 0.197                          | 0.003                  | Cor...PB                   | 0.169                          | 0.004                  |
| Cor <sub>(N)</sub> ...DB   | 0.098                          | 0.016                  | Cor <sub>(N)</sub> ...TB   | 0.192                          | 0.008                  | Cor <sub>(N)</sub> ...PB   | 0.164                          | 0.009                  |
| Cor <sub>(2N)</sub> ...DB  | 0.097                          | 0.017                  | Cor <sub>(2N)</sub> ...TB  | 0.181                          | 0.019                  | Cor <sub>(2N)</sub> ...PB  | 0.153                          | 0.020                  |
| Cor <sub>(3N)</sub> ...DB  | 0.094                          | 0.020                  | Cor <sub>(3N)</sub> ...TB  | 0.177                          | 0.023                  | Cor <sub>(3N)</sub> ...PB  | 0.150                          | 0.023                  |
| Cor <sub>(B)</sub> ...DB   | 0.108                          | 0.007                  | Cor <sub>(B)</sub> ...TB   | 0.201                          | -0.001                 | Cor <sub>(B)</sub> ...PB   | 0.173                          | 0.000                  |
| Cor <sub>(2B)</sub> ...DB  | 0.114                          | 0.000                  | Cor <sub>(2B)</sub> ...TB  | 0.206                          | -0.006                 | Cor <sub>(2B)</sub> ...PB  | 0.180                          | -0.007                 |
| Cor <sub>(3B)</sub> ...DB  | 0.110                          | 0.004                  | Cor <sub>(3B)</sub> ...TB  | 0.206                          | -0.006                 | Cor <sub>(3B)</sub> ...PB  | 0.175                          | -0.002                 |
| Cor <sub>(BN)</sub> ...DB  | 0.107                          | 0.007                  | Cor <sub>(BN)</sub> ...TB  | 0.197                          | 0.002                  | Cor <sub>(BN)</sub> ...PB  | 0.166                          | 0.007                  |
| Cor <sub>(2BN)</sub> ...DB | 0.097                          | 0.017                  | Cor <sub>(2BN)</sub> ...TB | 0.195                          | 0.005                  | Cor <sub>(2BN)</sub> ...PB | 0.163                          | 0.010                  |
| Cor <sub>(3BN)</sub> ...DB | 0.096                          | 0.018                  | Cor <sub>(3BN)</sub> ...TB | 0.186                          | 0.014                  | Cor <sub>(3BN)</sub> ...PB | 0.158                          | 0.015                  |

**Supplementary Table S2** The B-H<sub>b</sub> distance (in Å) in free borane and in their complexes obtained at M06-2X/6-31++G(d,p) level of theory

| System/complex             | B-H <sub>b</sub> distance | System/complex             | B-H <sub>b</sub> distance | B-H <sub>b</sub> distance | System/complex             | B-H <sub>b</sub> distance |
|----------------------------|---------------------------|----------------------------|---------------------------|---------------------------|----------------------------|---------------------------|
| DB                         | 1.3128                    | TB                         | 1.2517                    | 1.4112                    | PB                         | 1.3419                    |
| Cor...DB                   | 1.3089                    | Cor...TB                   | 1.2543                    | 1.4129                    | Cor...PB                   | 1.3411                    |
| Cor <sub>(N)</sub> ...DB   | 1.3067                    | Cor <sub>(N)</sub> ...TB   | 1.2540                    | 1.4124                    | Cor <sub>(N)</sub> ...PB   | 1.3393                    |
| Cor <sub>(2N)</sub> ...DB  | 1.3121                    | Cor <sub>(2N)</sub> ...TB  | 1.2541                    | 1.4188                    | Cor <sub>(2N)</sub> ...PB  | 1.3390                    |
| Cor <sub>(3N)</sub> ...DB  | 1.3118                    | Cor <sub>(3N)</sub> ...TB  | 1.2534                    | 1.4149                    | Cor <sub>(3N)</sub> ...PB  | 1.3387                    |
| Cor <sub>(B)</sub> ...DB   | 1.3070                    | Cor <sub>(B)</sub> ...TB   | 1.2545                    | 1.4195                    | Cor <sub>(B)</sub> ...PB   | 1.3392                    |
| Cor <sub>(2B)</sub> ...DB  | 1.3061                    | Cor <sub>(2B)</sub> ...TB  | 1.2549                    | 1.4135                    | Cor <sub>(2B)</sub> ...PB  | 1.3396                    |
| Cor <sub>(3B)</sub> ...DB  | 1.3089                    | Cor <sub>(3B)</sub> ...TB  | 1.2545                    | 1.4126                    | Cor <sub>(3B)</sub> ...PB  | 1.3403                    |
| Cor <sub>(BN)</sub> ...DB  | 1.3111                    | Cor <sub>(BN)</sub> ...TB  | 1.2546                    | 1.4128                    | Cor <sub>(BN)</sub> ...PB  | 1.3396                    |
| Cor <sub>(2BN)</sub> ...DB | 1.3078                    | Cor <sub>(2BN)</sub> ...TB | 1.2540                    | 1.4121                    | Cor <sub>(2BN)</sub> ...PB | 1.3357                    |
| Cor <sub>(3BN)</sub> ...DB | 1.3108                    | Cor <sub>(3BN)</sub> ...TB | 1.2525                    | 1.4142                    | Cor <sub>(3BN)</sub> ...PB | 1.3387                    |

**Supplementary Table S3**  $E_{\text{HOMO}}$ ,  $E_{\text{LUMO}}$  and  $\Delta E$  (in kcal mol<sup>-1</sup>) of undoped/doped Cor and their respective complexes in cyclohexane (ch) and water (wat) obtained at M06-2X/6-31++G(d,p) level of theory.

| Systems                    | $E_{\text{HOMO(ch)}}$ | $E_{\text{LUMO(ch)}}$ | $\Delta E_{\text{(ch)}}$ | $E_{\text{HOMO(wat)}}$ | $E_{\text{LUMO(wat)}}$ | $\Delta E_{\text{(wat)}}$ |
|----------------------------|-----------------------|-----------------------|--------------------------|------------------------|------------------------|---------------------------|
| Cor                        | -158.23               | -23.61                | 134.62                   | -160.99                | -26.56                 | 134.43                    |
| Cor <sub>(N)</sub>         | -98.47                | -22.36                | 76.11                    | -100.92                | -24.60                 | 76.32                     |
| Cor <sub>(2N)</sub>        | -95.02                | -27.67                | 67.35                    | -97.43                 | -29.58                 | 67.85                     |
| Cor <sub>(3N)</sub>        | -98.36                | -21.41                | 76.95                    | -100.26                | -23.27                 | 76.99                     |
| Cor <sub>(B)</sub>         | -156.19               | -24.60                | 131.58                   | -158.71                | -27.32                 | 131.39                    |
| Cor <sub>(2B)</sub>        | -153.19               | -88.49                | 64.71                    | -158.18                | -91.30                 | 66.88                     |
| Cor <sub>(3B)</sub>        | -151.30               | -81.48                | 69.82                    | -154.33                | -84.51                 | 69.82                     |
| Cor <sub>(BN)</sub>        | -149.81               | -30.38                | 119.43                   | -152.69                | -32.81                 | 119.89                    |
| Cor <sub>(2BN)</sub>       | -144.84               | -34.65                | 110.18                   | -147.63                | -36.72                 | 110.82                    |
| Cor <sub>(3BN)</sub>       | -146.08               | -33.84                | 112.24                   | -148.23                | -35.84                 | 112.38                    |
| Cor...DB                   | -158.79               | -24.81                | 133.98                   | -161.53                | -27.43                 | 134.10                    |
| Cor...TB                   | -159.35               | -25.08                | 134.27                   | -161.53                | -27.14                 | 134.39                    |
| Cor...PB                   | -161.83               | -27.57                | 134.26                   | -162.59                | -28.22                 | 134.37                    |
| Cor <sub>(N)</sub> ...DB   | -99.37                | -23.14                | 76.23                    | -102.03                | -25.60                 | 76.43                     |
| Cor <sub>(N)</sub> ...TB   | -99.74                | -23.78                | 75.96                    | -101.86                | -25.73                 | 76.13                     |
| Cor <sub>(N)</sub> ...PB   | -102.89               | -26.29                | 76.60                    | -103.57                | -26.83                 | 76.74                     |
| Cor <sub>(2N)</sub> ...DB  | -95.61                | -28.44                | 67.17                    | -98.32                 | -30.60                 | 67.72                     |
| Cor <sub>(2N)</sub> ...TB  | -96.64                | -28.90                | 67.74                    | -99.00                 | -30.83                 | 68.17                     |
| Cor <sub>(2N)</sub> ...PB  | -99.68                | -31.26                | 68.42                    | -100.43                | -31.74                 | 68.69                     |
| Cor <sub>(3N)</sub> ...DB  | -99.46                | -22.84                | 76.62                    | -101.76                | -25.04                 | 76.72                     |
| Cor <sub>(3N)</sub> ...TB  | -99.75                | -23.25                | 76.50                    | -101.77                | -25.21                 | 76.56                     |
| Cor <sub>(3N)</sub> ...PB  | -102.16               | -26.26                | 75.90                    | -102.67                | -26.71                 | 75.96                     |
| Cor <sub>(B)</sub> ...DB   | -156.86               | -26.55                | 130.32                   | -159.46                | -29.30                 | 130.16                    |
| Cor <sub>(B)</sub> ...TB   | -157.10               | -26.16                | 130.94                   | -159.21                | -28.42                 | 130.79                    |
| Cor <sub>(B)</sub> ...PB   | -159.37               | -28.86                | 130.52                   | -160.11                | -29.61                 | 130.51                    |
| Cor <sub>(2B)</sub> ...DB  | -153.89               | -88.52                | 65.37                    | -157.15                | -91.11                 | 66.04                     |
| Cor <sub>(2B)</sub> ...TB  | -154.53               | -88.89                | 65.64                    | -157.18                | -90.88                 | 66.30                     |
| Cor <sub>(2B)</sub> ...PB  | -157.24               | -91.70                | 65.53                    | -158.45                | -92.26                 | 66.20                     |
| Cor <sub>(3B)</sub> ...DB  | -151.80               | -81.19                | 70.61                    | -154.47                | -83.89                 | 70.58                     |
| Cor <sub>(3B)</sub> ...TB  | -152.06               | -82.41                | 69.65                    | -154.38                | -84.64                 | 69.74                     |
| Cor <sub>(3B)</sub> ...PB  | -154.47               | -85.44                | 69.03                    | -155.32                | -86.19                 | 69.13                     |
| Cor <sub>(BN)</sub> ...DB  | -150.45               | -31.10                | 119.35                   | -153.45                | -33.67                 | 119.77                    |
| Cor <sub>(BN)</sub> ...TB  | -150.94               | -31.61                | 119.33                   | -153.50                | -33.76                 | 119.74                    |
| Cor <sub>(BN)</sub> ...PB  | -153.74               | -34.49                | 119.25                   | -154.53                | -34.85                 | 119.58                    |
| Cor <sub>(2BN)</sub> ...DB | -145.54               | -35.44                | 110.1                    | -148.56                | -37.76                 | 110.80                    |
| Cor <sub>(2BN)</sub> ...TB | -145.92               | -35.89                | 110.08                   | -148.52                | -37.71                 | 110.81                    |
| Cor <sub>(2BN)</sub> ...PB | -148.59               | -38.32                | 110.28                   | -149.48                | -38.59                 | 110.89                    |
| Cor <sub>(3BN)</sub> ...DB | -146.59               | -34.40                | 112.19                   | -149.02                | -36.68                 | 112.34                    |
| Cor <sub>(3BN)</sub> ...TB | -147.20               | -35.18                | 112.02                   | -149.18                | -36.97                 | 112.21                    |
| Cor <sub>(3BN)</sub> ...PB | -149.42               | -37.60                | 111.82                   | -150.02                | -37.98                 | 112.04                    |

**Supplementary Table S4** BSSE correction (in kcal mol<sup>-1</sup>) for the complexes of undoped/doped Cor with boranes obtained at M06-2X/6-31++G(d,p) level of theory.

| complex                   | BSSE correction | complex                   | BSSE correction | complex                    | BSSE correction |
|---------------------------|-----------------|---------------------------|-----------------|----------------------------|-----------------|
| Cor...DB                  | 0.81            | -                         | -               | -                          | -               |
| Cor...TB                  | 1.10            | -                         | -               | -                          | -               |
| Cor...PB                  | 1.38            | -                         | -               | -                          | -               |
| Cor <sub>(N)</sub> ...DB  | 0.80            | Cor <sub>(B)</sub> ...DB  | 0.68            | Cor <sub>(BN)</sub> ...DB  | 0.71            |
| Cor <sub>(N)</sub> ...TB  | 1.07            | Cor <sub>(B)</sub> ...TB  | 0.91            | Cor <sub>(BN)</sub> ...TB  | 0.95            |
| Cor <sub>(N)</sub> ...PB  | 1.36            | Cor <sub>(B)</sub> ...PB  | 1.22            | Cor <sub>(BN)</sub> ...PB  | 1.28            |
| Cor <sub>(2N)</sub> ...DB | 0.86            | Cor <sub>(2B)</sub> ...DB | 0.72            | Cor <sub>(2BN)</sub> ...DB | 0.71            |
| Cor <sub>(2N)</sub> ...TB | 1.16            | Cor <sub>(2B)</sub> ...TB | 0.98            | Cor <sub>(2BN)</sub> ...TB | 0.93            |
| Cor <sub>(2N)</sub> ...PB | 1.48            | Cor <sub>(2B)</sub> ...PB | 1.37            | Cor <sub>(2BN)</sub> ...PB | 1.28            |
| Cor <sub>(3N)</sub> ...DB | 0.93            | Cor <sub>(3B)</sub> ...DB | 0.81            | Cor <sub>(3BN)</sub> ...DB | 0.67            |
| Cor <sub>(3N)</sub> ...TB | 1.21            | Cor <sub>(3B)</sub> ...TB | 1.00            | Cor <sub>(3BN)</sub> ...TB | 0.86            |
| Cor <sub>(3N)</sub> ...PB | 1.61            | Cor <sub>(3B)</sub> ...PB | 1.42            | Cor <sub>(3BN)</sub> ...PB | 1.16            |



**Supplementary Table S5**  $\lambda_{\max}$  values and their corresponding oscillator strength ( $f$ ), excitation energy ( $E$ ) with dominant transition for undoped/doped Cor in THF obtained at B3LYP/6-31++G(d,p) level of theory.

| Systems              | $\lambda_{\max}$ in nm | Oscillator strength, $f$ | Excitation energy in eV | Dominant transition | Orbital contribution |
|----------------------|------------------------|--------------------------|-------------------------|---------------------|----------------------|
| Cor                  | 307.6                  | 0.985                    | 4.03                    | HOMO-1→LUMO+1       | 0.465                |
|                      |                        |                          |                         | HOMO→LUMO           | 0.462                |
| Cor <sub>(N)</sub>   | 376.9                  | 0.068                    | 3.30                    | (HOMO-2)A→LUMOA     | 0.566                |
|                      |                        |                          |                         | (HOMO-2)B→HOMOB     | 0.496                |
|                      | 581.0                  | 0.035                    | 2.13                    | HOMOA→(LUMO+3)A     | 0.972                |
|                      |                        |                          |                         | (HOMO-2)B→LUMOB     | 0.131                |
| Cor <sub>(2N)</sub>  | 352.2                  | 0.055                    | 3.52                    | HOMO-2→LUMO         | 0.583                |
|                      |                        |                          |                         | HOMO-1→LUMO+1       | 0.375                |
|                      | 542.4                  | 0.140                    | 2.29                    | HOMO→LUMO+3         | 0.684                |
| Cor <sub>(3N)</sub>  | 579.9                  | 0.181                    | 2.14                    | HOMOA→(LUMO+2)A     | 0.588                |
|                      |                        |                          |                         | (HOMO-1)B→(LUMO+2)B | 0.768                |
| Cor <sub>(B)</sub>   | 329.7                  | 0.134                    | 3.76                    | (HOMO-1)A→(LUMO+1)A | 0.531                |
|                      |                        |                          |                         | (HOMO-1)B→LUMOB     | 0.531                |
|                      | 503.7                  | 0.046                    | 2.46                    | (HOMO-1)A→LUMO A    | 0.240                |
|                      |                        |                          |                         | (HOMO-5)B→LUMO B    | 0.911                |
| Cor <sub>(2B)</sub>  | 300.7                  | 0.582                    | 4.12                    | HOMO-2→LUMO+1       | 0.347                |
|                      |                        |                          |                         | HOMO-1→LUMO+2       | 0.418                |
|                      | 495.5                  | 0.145                    | 2.50                    | HOMO-4→LUMO         | 0.677                |
|                      |                        |                          |                         | HOMO→LUMO+1         | 0.108                |
| Cor <sub>(3B)</sub>  | 573.2                  | 0.207                    | 2.16                    | (HOMO-3)A→LUMO A    | 0.796                |
|                      |                        |                          |                         | (HOMO-3)B→HOMOB     | 0.571                |
| Cor <sub>(BN)</sub>  | 250.8                  | 0.248                    | 4.94                    | HOMO-1→LUMO+1       | 0.289                |
|                      |                        |                          |                         | HOMO→LUMO+2         | 0.500                |
|                      | 327.9                  | 0.530                    | 3.78                    | HOMO-3→LUMO         | 0.517                |
|                      |                        |                          |                         | HOMO-2→LUMO+2       | 0.309                |
| Cor <sub>(2BN)</sub> | 274.9                  | 0.204                    | 4.51                    | HOMO-1→LUMO+1       | 0.144                |
|                      |                        |                          |                         | HOMO→LUMO           | 0.634                |
|                      | 345.2                  | 0.580                    | 3.59                    | HOMO-3→LUMO         | 0.606                |
|                      |                        |                          |                         | HOMO→LUMO+3         | 0.235                |
| Cor <sub>(3BN)</sub> | 272.7                  | 0.083                    | 4.55                    | HOMO-1→LUMO         | 0.351                |
|                      |                        |                          |                         | HOMO→LUMO+1         | 0.344                |
|                      | 357.9                  | 1.186                    | 3.46                    | HOMO-1→LUMO+3       | 0.483                |
|                      |                        |                          |                         | HOMO→LUMO+2         | 0.483                |

**Supplementary Table S6**  $\lambda_{\max}$  values with corresponding oscillator strength ( $f$ ), excitation energy ( $E$ ) with dominant transition in complexes of undoped/N-doped Cor in THF obtained at B3LYP/6-31++G(d,p) level of theory.

| Complexes                 | $\lambda_{\max}$ in nm | Oscillator strength, $f$ | Excitation energy in eV | Dominant transition | Orbital contribution |
|---------------------------|------------------------|--------------------------|-------------------------|---------------------|----------------------|
| Cor...DB                  | 308.9                  | 0.904                    | 4.01                    | HOMO-1→LUMO         | 0.484                |
|                           |                        |                          |                         | HOMO→LUMO+1         | 0.494                |
| Cor...TB                  | 308.2                  | 0.899                    | 4.02                    | HOMO-1→LUMO         | 0.472                |
|                           |                        |                          |                         | HOMO→LUMO+1         | 0.473                |
| Cor...PB                  | 308.6                  | 0.034                    | 4.02                    | HOMO-1→LUMO         | 0.488                |
|                           |                        |                          |                         | HOMO→LUMO+1         | 0.487                |
| Cor <sub>(N)</sub> ...DB  | 389.5                  | 0.034                    | 3.18                    | (HOMO-1)A→LUMOA     | 0.498                |
|                           |                        |                          |                         | (HOMO-1)B→HOMOB     | 0.715                |
| Cor <sub>(N)</sub> ...TB  | 387.8                  | 0.032                    | 3.20                    | HOMOA→(LUMO+4)A     | 0.968                |
|                           |                        |                          |                         | (HOMO-2)B→LUMOB     | 0.124                |
|                           |                        |                          |                         | (HOMO-1)A→LUMOA     | 0.465                |
|                           |                        |                          |                         | (HOMO-1)B→HOMOB     | 0.663                |
| Cor <sub>(N)</sub> ...PB  | 390.0                  | 0.035                    | 3.18                    | HOMOA→(LUMO+3)A     | 0.973                |
|                           |                        |                          |                         | (HOMO-2)B→LUMOB     | 0.124                |
|                           |                        |                          |                         | (HOMO-1)A→(LUMO+1)A | 0.490                |
| Cor <sub>(2N)</sub> ...DB | 353.1                  | 0.034                    | 3.51                    | (HOMO-1)B→LUMOB     | 0.729                |
|                           |                        |                          |                         | HOMOA→(LUMO+3)A     | 0.973                |
|                           |                        |                          |                         | (HOMO-2)B→LUMOB     | 0.126                |
| Cor <sub>(2N)</sub> ...TB | 352.9                  | 0.044                    | 3.51                    | HOMO-2→LUMO         | 0.553                |
|                           |                        |                          |                         | HOMO-1→LUMO+1       | 0.394                |
|                           |                        |                          |                         | HOMO→LUMO+4         | 0.685                |
| Cor <sub>(2N)</sub> ...PB | 353.0                  | 0.041                    | 3.51                    | HOMO-2→LUMO         | 0.583                |
|                           |                        |                          |                         | HOMO-1→LUMO+1       | 0.364                |
|                           |                        |                          |                         | HOMO→LUMO+3         | 0.685                |
| Cor <sub>(3N)</sub> ...DB | 583.2                  | 0.157                    | 2.13                    | HOMO-2→LUMO         | 0.596                |
|                           |                        |                          |                         | HOMO-1→LUMO+2       | 0.319                |
| Cor <sub>(3N)</sub> ...TB | 589.3                  | 0.148                    | 2.10                    | HOMO→LUMO+3         | 0.686                |
|                           |                        |                          |                         | HOMOA→(LUMO+2)A     | 0.584                |
| Cor <sub>(3N)</sub> ...PB | 584.5                  | 0.156                    | 2.12                    | (HOMO-1)B→(LUMO+3)B | 0.761                |
|                           |                        |                          |                         | HOMOA→(LUMO+2)A     | 0.582                |
| Cor <sub>(3N)</sub> ...PB | 584.5                  | 0.156                    | 2.12                    | (HOMO-1)B→(LUMO+2)B | 0.769                |
|                           |                        |                          |                         | HOMOA→(LUMO+2)A     | 0.583                |
| Cor <sub>(3N)</sub> ...PB | 584.5                  | 0.156                    | 2.12                    | (HOMO-1)B→(LUMO+2)B | 0.770                |
|                           |                        |                          |                         | HOMOA→(LUMO+2)A     | 0.583                |

**Supplementary Table S7**  $\lambda_{\max}$  values with corresponding oscillator strength ( $f$ ), excitation energy ( $E$ ) with dominant transition in complexes of B-doped Cor in THF obtained at B3LYP/6-31++G(d,p) level of theory

| Complexes               | $\lambda_{\max}$ in nm | Oscillator strength, $f$ | Excitation energy in eV | Dominant transition                        | Orbital contribution |
|-------------------------|------------------------|--------------------------|-------------------------|--------------------------------------------|----------------------|
| Cor <sub>(B)</sub> ⋯DB  | 342.3                  | 0.087                    | 3.62                    | (HOMO-2)A→(LUMO+1)A<br>(HOMO-1)B→(LUMO+1)B | 0.429<br>0.596       |
|                         | 509.4                  | 0.046                    | 2.43                    | (HOMO-1)A→LUMOA<br>(HOMO-5)B→HOMOB         | 0.250<br>0.910       |
| Cor <sub>(B)</sub> ⋯TB  | 331.5                  | 0.070                    | 3.74                    | (HOMO-1)A→(LUMO+1) A<br>(HOMO-9)B→HOMOB    | 0.442<br>0.504       |
|                         | 507.4                  | 0.043                    | 2.44                    | (HOMO-1)A→LUMOA<br>(HOMO-5)B→HOMOB         | 0.237<br>0.911       |
| Cor <sub>(B)</sub> ⋯PB  | 342.4                  | 0.067                    | 3.62                    | (HOMO-2)A→(LUMO+1)A<br>(HOMO-1)B→(LUMO+1)B | 0.443<br>0.600       |
|                         | 507.0                  | 0.043                    | 2.45                    | (HOMO-1)A→LUMOA<br>(HOMO-5)B→HOMOB         | 0.243<br>0.909       |
| Cor <sub>(2B)</sub> ⋯DB | 301.7                  | 0.515                    | 4.12                    | HOMO-2→LUMO+2<br>HOMO-1→LUMO+1             | 0.452<br>0.323       |
|                         | 488.9                  | 0.119                    | 2.54                    | HOMO-6→LUMO<br>HOMO-4→LUMO                 | 0.349<br>0.583       |
| Cor <sub>(2B)</sub> ⋯TB | 303.2                  | 0.332                    | 4.09                    | HOMO-10→LUMO<br>HOMO-1→LUMO+2              | 0.331<br>0.277       |
|                         | 488.0                  | 0.112                    | 2.54                    | HOMO-6→LUMO<br>HOMO-4→LUMO                 | 0.388<br>0.558       |
| Cor <sub>(2B)</sub> ⋯PB | 301.9                  | 0.481                    | 4.12                    | HOMO-2→LUMO+1<br>HOMO-1→LUMO+2             | 0.357<br>0.406       |
|                         | 489.1                  | 0.111                    | 2.53                    | HOMO-6→LUMO<br>HOMO-4→LUMO                 | 0.385<br>0.556       |
| Cor <sub>(3B)</sub> ⋯DB | 582.8                  | 0.176                    | 2.13                    | (HOMO-3)A→LUMOA<br>(HOMO-3)B→HOMOB         | 0.796<br>0.563       |
| Cor <sub>(3B)</sub> ⋯TB | 591.2                  | 0.167                    | 2.10                    | (HOMO-3)A→LUMOA<br>(HOMO-3)B→HOMOB         | 0.797<br>0.569       |
| Cor <sub>(3B)</sub> ⋯PB | 581.2                  | 0.163                    | 2.13                    | (HOMO-3)A→LUMOA<br>(HOMO-3)B→HOMOB         | 0.777<br>0.570       |

**Supplementary Table S8**  $\lambda_{\max}$  values with corresponding oscillator strength ( $f$ ), excitation energy ( $E$ ) with dominant transition in complexes of BN-doped Cor in THF obtained at B3LYP/6-31++G(d,p) level of theory.

| Complexes                  | $\lambda_{\max}$ in nm | Oscillator strength, $f$ | Excitation energy in eV | Dominant transition          | Orbital contribution |
|----------------------------|------------------------|--------------------------|-------------------------|------------------------------|----------------------|
| Cor <sub>(BN)</sub> ···DB  | 244.9                  | 0.002                    | 5.06                    | HOMO→LUMO+7<br>HOMO→LUMO+8   | 0.589<br>0.305       |
|                            | 328.1                  | 0.542                    | 3.78                    | HOMO-1→LUMO+1<br>HOMO→LUMO   | 0.552<br>0.254       |
|                            | 247.9                  | 0.248                    | 5.00                    | HOMO-2→LUMO+2<br>HOMO→LUMO+7 | 0.352<br>0.378       |
| Cor <sub>(BN)</sub> ···TB  | 328.9                  | 0.503                    | 3.77                    | HOMO-1→LUMO+1<br>HOMO→LUMO+2 | 0.523<br>0.293       |
|                            | 248.5                  | 0.096                    | 4.27                    | HOMO-2→LUMO+1<br>HOMO→LUMO+3 | 0.492<br>0.371       |
| Cor <sub>(BN)</sub> ···PB  | 327.1                  | 0.504                    | 3.79                    | HOMO-1→LUMO+1<br>HOMO→LUMO+2 | 0.535<br>0.285       |
|                            | 276.5                  | 0.202                    | 4.48                    | HOMO-2→LUMO+1<br>HOMO→LUMO+4 | 0.138<br>0.630       |
| Cor <sub>(2BN)</sub> ···DB | 347.3                  | 0.511                    | 3.57                    | HOMO-1→LUMO+1<br>HOMO→LUMO+2 | 0.554<br>0.287       |
|                            | 280.3                  | 0.208                    | 4.42                    | HOMO-2→LUMO+1<br>HOMO→LUMO+3 | 0.284<br>0.575       |
| Cor <sub>(2BN)</sub> ···TB | 346.8                  | 0.511                    | 3.57                    | HOMO-1→LUMO+1<br>HOMO→LUMO+2 | 0.596<br>0.233       |
|                            | 276.2                  | 0.186                    | 4.49                    | HOMO-2→LUMO+1<br>HOMO→LUMO+3 | 0.182<br>0.613       |
| Cor <sub>(2BN)</sub> ···PB | 346.8                  | 0.492                    | 3.58                    | HOMO-1→LUMO+1<br>HOMO→LUMO+2 | 0.579<br>0.270       |
|                            | 274.3                  | 0.059                    | 4.52                    | HOMO-1→LUMO+3<br>HOMO→LUMO+4 | 0.243<br>0.612       |
| Cor <sub>(3BN)</sub> ···DB | 358.4                  | 1.084                    | 3.46                    | HOMO-1→LUMO<br>HOMO→LUMO+1   | 0.490<br>0.488       |
|                            | 274.7                  | 0.061                    | 4.51                    | HOMO-1→LUMO+4<br>HOMO→LUMO+2 | 0.532<br>0.309       |
| Cor <sub>(3BN)</sub> ···TB | 359.0                  | 1.063                    | 3.45                    | HOMO-1→LUMO<br>HOMO→LUMO+1   | 0.379<br>0.377       |
|                            | 274.9                  | 0.084                    | 4.51                    | HOMO-1→LUMO+4<br>HOMO→LUMO+2 | 0.543<br>0.339       |
| Cor <sub>(3BN)</sub> ···PB | 358.6                  | 1.076                    | 3.46                    | HOMO-1→LUMO+1<br>HOMO→LUMO   | 0.506<br>0.489       |
